# Supplementary material
Source: PubMed Central journal article supplement (PMC3262898)
Supplement: NIHMS333269-supplement-1_si_001.pdf [file NIHMS333269-supplement-1_si_001.pdf]

## Supporting information

### The Functional Promiscuity of the COG0720 Family

Gabriela Phillips<sup>1</sup>, Laura L. Grochowski<sup>2</sup>, Shilah Bonnett<sup>3</sup>, Huimin Xu<sup>2</sup>, Marc Bailly<sup>1&</sup>, Crysten Haas-Blaby<sup>1§</sup>, Basma El Yacoubi<sup>1</sup>, Dirk Iwata-Reuyl<sup>3</sup>, Robert H. White<sup>2</sup> and Valérie de Crécy-Lagard<sup>1\*</sup>

#### This Supporting Information Contains

##### 1. Supplemental data 1.

##### 2. Supplemental Tables

##### 3. Supplemental Material and Methods

##### 4. Supplemental Results

##### 5. Supplemental References

##### 6. Supplemental Figures

#### Supplemental data 1.

##### PTPS-VI sequences identified

gi|229578027|ref|YP\_002836425.1| hypothetical protein YG5714\_0210 [Sulfolobus islandicus Y.G.57.14]  
MKVRVGIIEGITMDSAHYTLSSYADSQIHGHTYIINVEVEGEVNEKSGFVVDFNLLKKMV  
REVIQEWDHKL  
IIPKVDLDKSRFEGPFRVDYKVIDAPFPTAEYIGIEIAKDIYLKLNKKYRILLKIYEGKDSY  
AIIIEYP

>gi|227826615|ref|YP\_002828394.1| hypothetical protein M1425\_0206 [Sulfolobus islandicus M.14.25]  
MKVVRVGIEGITMDSAHYTLSSYADSQIHGHTYIINVEVEGEVNEKSGFVVDNFLLKKMV  
REVIQEWDHKL  
IIPKVDLDKSRFEGPFRVDYKVIDAPFPTAEYIGIEVAKDIYLKLNKKYRILLKIYEGKDSY  
AIIEYP

>gi|227829256|ref|YP\_002831035.1| hypothetical protein LS215\_0237 [Sulfolobus islandicus L.S.2.15]  
MKVVKVGIEGITMDSAHYTLSSYADSQIHGHTYIINVEVEGEVNEKSGFVVDNFLLKKMV  
REVIQEWDHKL  
IIPKVDLDKSRFEGPFRVDYKVIDAPFPTAEYIGIEIAKDIYLKLNKKYRILLKIYEGKDSY  
AIIEYP

>gi|15899165|ref|NP\_343770.1| hypothetical protein SSO2412 [Sulfolobus solfataricus P2]  
MKVVRVGIEGITMDSAHYTLSSYADSQIHGHTYIVNVEVEGEVNEKSGFVVDNFLLKKIHK  
ETIQEWDHKL  
IIPKVDLDKSRFEGPFRVDYKVIDAPFPTAEYIGIEIAKDIYLKLNKKYRILLKIYEGKDSY  
AIIEYP

>gi|330835333|ref|YP\_004410061.1| putative 6-pyruvoyl tetrahydropterin synthase  
[Metallosphaera cuprina Ar-4]  
MKIKVGIIEGFTIDSAHYTLSSPKDDQLHGHTYTVSVEVEGDINEDNGFVVDNFNKLRLNV  
NQTISLWDHKF  
IVPKKDFEKINIASPFRVDVVKLIEAPYPTVEYIGIEIAKHIYNSLGNNFKISVKIYEGRDSYA  
VVEYP

>gi|332797876|ref|YP\_004459376.1| putative 6-pyruvoyl tetrahydropterin synthase [Acidianus hospitalis W1]  
MKVKIGIEGFTIDSAHYTLSSPGDSQLHGHTYIINVEVEGNINPANGFVIDFNKLKDEIGKI  
IKEWDHKL  
IVPKKDLEKISISGPFRNEIKIIEEDYPTAEYIGFELAKEIYNRINMPIKIKIYEGKDSYAIIEY  
P

>gi|15920762|ref|NP\_376431.1| hypothetical protein ST0543 [Sulfolobus tokodaii str. 7]  
MKVVKVGLGLSFDSDAHYTLSSSEGNQQIHGHTYKLSIEIEGNSIDENTGFVIDFEILKKIIND  
IVKDWDHK  
LIIPSEDLNQIYFKGPFKLDIKVIPYKYPTAEYIGLEIAKSIYEKLQKKYKITVKIYEGENNY  
AIIEYP

>gi|70606719|ref|YP\_255589.1| hypothetical protein Saci\_0934 [Sulfolobus acidocaldarius DSM 639]

MKVVIGVEGFSFDSAHYTLSSKGNDQIHGHTYKLSVEIEGQDVKNSGFVIDFMILTKIIH  
EVIREWDHK

LIIPSRDARKIELKGPFKVEYKIIIEEDFPTVEYIGSEIAKDIYEKLEKKFKVVRVKIYEGENSY  
ALIEYP

>gi|146303412|ref|YP\_001190728.1| putative 6-pyruvoyl tetrahydropterin synthase  
[Metallosphaera sedula DSM 5348]

MKVRVGIIEGFSIDSAHYTLSSPKDNQLHGHTYRVTVEVEGEVHEENGFFVDFNKLRELI  
KEAISSWDHKF

IVPRRDMDKISITSPFKLEVKIIIEAPYPTVEYIGMEIAKYVFTRLGNSNFKVFVKIYEGSDSY  
ALIEYP

### **PTPS-V sequences identified**

>gi|126459676|ref|YP\_001055954.1| hypothetical protein Pcal\_1063 [Pyrobaculum calidifontis  
JCM 11548]

MRTCVELRGSISVAHKPSFSPGWARVHGHDFITVGICVEGYRDLVDDADEASKKFREA  
LARMDGKYLAS

PQEKVALDAGEIYVPCNLPGVSGECLAKHIADLVGAAWVRVCESSLGGPCFYFSKS

>gi|18313125|ref|NP\_559792.1| hypothetical protein PAE2137 [Pyrobaculum aerophilum str.  
IM2]

MRTCVELRGSISVAHKPAFSPTWSRVHGHDFYITVGICKEGYHEVVVDASAAGDRFKE  
LLAKLDGKYLAS

SSEQTPLSADEVYIVPCEAKGVSUGECLAKHIADLMGATWVRVCEASAYASPCFYFER

>gi|171185792|ref|YP\_001794711.1| hypothetical protein Tneu\_1339 [Thermoproteus  
neutrophilus V24Sta]

MRTCVELKGSVSVAHNPSFSPKWARIHGHDFYITVGICREGYTDVVVDAAEAGDKFRA  
LLASIDGKYLAS

PLENPPLEPSGVYTVPCGQPGVSGECLAKYIAELMGASWVRVCEGLGSPCFYFER

>gi|119872458|ref|YP\_930465.1| hypothetical protein Pisl\_0946 [Pyrobaculum islandicum DSM  
4184]

MRTCVELRGSISVAHNPSFSPKWARIHGHDFYITVGICRDGYTDVVVDAAEVSEKFRKV  
LTSMDGRYLAS

PFEKLPPDIKDVYIVPCSLSGVSGECLARHIAELMRASWVRICESGFGSPCFYYES

>gi|145591060|ref|YP\_001153062.1| hypothetical protein Pars\_0824 [Pyrobaculum arsenaticum  
DSM 13514]

MRTCVELRGSISVAHKPSFSTAWGRVHGHDFYITASICRDGFHDVVVDAGEAGERLREL  
LSKMDGKYLAS

SAEQVDLPQEEVYVPCNAAGLSGECCLAKHIADLLGASWVRVCESGYGAPCFLYER

>gi|325969372|ref|YP\_004245564.1| hypothetical protein VMUT\_1861 [Vulcanisaeta moutnovskia 768-28]

MCIIASTVVETTCLSMRFMFSGAHRVRFSGVYGNHGHNYDITIRLCVNGRRTLIMDIDK  
VRHEIQGIIS  
AFDGKYIKSMNEETRELTPEYVEIPCIPEGATGECLAWYMDKVLDVLRNMGISEITET  
QVVVCDSPIN  
CFESSLLST

>gi|307595147|ref|YP\_003901464.1| hypothetical protein Vdis\_1024 [Vulcanisaeta distributa DSM 14429]

MKFMFSGAHRVRFSDIYGNVHGHNYDVTIRLCVRGRRMLVTDIDKIRREVQGIVNTFD  
GKYIKSSMESAQ  
GLMPGELVEIPCIPEGATGECVAWYFIDSVMGILSRLGINDVVEVQVIVCDSPMNCFEAR  
SS

**Supplemental Table 1.** Organisms predicted to contain COG0720 enzymes with dual PTPSI/III activities.

| <b>Organism</b>                             | <b>Accession numbers</b> | <b>Motif</b>  |
|---------------------------------------------|--------------------------|---------------|
| <i>Desulfuromonas acetoxidans</i>           | ZP_01312295.1            | GDCENLHGHNWK  |
| <i>Geobacter_sulfurreducens</i>             | NP_952770.1              | GDCENLHGHNWR  |
| <i>Pirellula_sp.</i>                        | NP_868552.1              | DICERIHGHNYGV |
| <i>Thermotoga_maritima</i>                  | NP_227854.1              | GKCERLHGHTYR  |
| <i>Geobacter_metallireducens</i>            | YP_384613.1              | GDCENLHGHNWK  |
| <i>Thermoanaerobacter_tengcongensis</i>     | NP_623903.1              | GKCEELHGHTYRL |
| <i>Desulfovibrio_desulfuricans</i>          | YP_388689.1              | GKCEALHGHNFG  |
| <i>Dehalococcoides_ethenogenes</i>          | YP_182300.1              | GKCENLHGHRYE  |
| <i>Blastopirellula_marina</i>               | ZP_01091150.1            | GTCERVHGHNYR  |
| <i>Solibacter_usitatus</i>                  | YP_822324.1              | GKCENVHGHNYR  |
| <i>Syntrophobacter_fumaroxidans</i>         | YP_844142.1              | GKCENLHGHNWK  |
| <i>Syntrophus_aciditrophicus</i>            | YP_462286.1              | GNCEHLHGHNWA  |
| <i>Clostridium_botulinum</i>                | YP_001383205.1           | GKCERLHGHTYG  |
| <i>Desulfovibrio_vulgaris</i>               | YP_010571.1              | GKCENLHGHNFA  |
| <i>Bacteroides_vulgatus</i>                 | YP_001299367.1           | SKCENLHGHNWI  |
| <i>Anaeromyxobacter_sp</i>                  | YP_001378545.1           | GKCERLHGHNW   |
| <i>Anaeromyxobacter_dehalogenans</i>        | YP_465721.1              | GKCERLHGHNWRV |
| <i>Thermotoga_petrophila</i>                | YP_001244479.1           | GKCEKLHGHTYR  |
| <i>Herpetosiphon_aurantiacus</i>            | YP_001545606.1           | GKCERLHGHNYSR |
| <i>Fervidobacterium_nodosum</i>             | YP_001411270.1           | GKCEKLHGHTYK  |
| <i>Pelobacter_propionicus</i>               | YP_901456.1              | GDCENLHGHNWK  |
| <i>Caldicellulosiruptor_saccharolyticus</i> | YP_001179049.1           | GKCERLHGHTYK  |
| <i>Thermoanaerobacter_pseudethanolicus</i>  | YP_001664327.1           | GKCEELHGHTYK  |
| <i>Desulfococcus_oleovorans</i>             | YP_001529374.1           | HKCENLHGHNWK  |
| <i>Dethiosulfovibrio_peptidovorans</i>      | ZP_06392544.1            | GKCEALHGHTYR  |
| <i>Planctomyces_limnophilus</i>             | YP_003630433.1           | NICERLHGHNWR  |
| <i>Denitrovibrio_acetiphilus</i>            | YP_003504095.1           | GKCENLHGHNWK  |

**Supplemental Table 2.** Distribution of QueD2 in sequenced organisms.

\* gene predicted to be regulated by Zur

| Organism                                         | QueD<br>(Accession) | Motif   | QueD2 (Accession)           | Motif                |
|--------------------------------------------------|---------------------|---------|-----------------------------|----------------------|
| <i>Acinetobacter baylii</i> sp. ADP1             |                     |         | YP_046954.1                 | CKRSIHGH             |
| <i>Acinetobacter baumannii</i> ATCC 17978        |                     |         | YP_001707113.1              | CKRSIHGH             |
| <i>Psychrobacter</i> sp. PRwf-1                  |                     |         | YP_001279719.1              | CKRSIHGH             |
| <i>Psychrobacter cryohalolentis</i> K5           |                     |         | YP_580760.1                 | CKHSIHGH             |
| <i>Sulfurovum</i> sp. NBC37-1                    |                     |         | YP_001357532.1              | CSENIHGH             |
| <i>Cupriavidus metallidurans</i> CH34            | YP_583724.1         | CRNIHGH | YP_583256.1*                | CSHSIHGH             |
| <i>Burkholderia cenocepacia</i> AU 1054          | YP_622375.1         | CRNLHGH | YP_622905.1*                | CSHSIHGH             |
| <i>Azotobacter vinelandii</i>                    | ZP_00091843.1       | CGRLHGH | YP_002800062.1*             | CSRSLHGH             |
| <i>Thiomicrospira denitrificans</i> ATCC 33889   |                     |         | fig 326298.3.peg.328        | CRSSIHGH             |
| <i>Campylobacter concisus</i> 13826              |                     |         | YP_001466043.1              | CRTSIHGH             |
| <i>Campylobacter jejuni</i> subsp. jejuni CF93-6 |                     |         | ZP_01067834.1               | CKSSIHGH             |
| <i>Campylobacter coli</i> RM2228                 |                     |         | ZP_00367800.1               | CKSSIHGH             |
| <i>Campylobacter upsaliensis</i> RM3195          |                     |         | ZP_00371720.1               | CKTSIHGH             |
| <i>Campylobacter lari</i> RM2100                 |                     |         | YP_002575991.1              | CKTSIHGH             |
| <i>Campylobacter hominis</i> ATCC BAA-381        |                     |         | YP_001405930.1              | CRESIHGH             |
| <i>Helicobacter mustelae</i> 43772               |                     |         | YP_003516807.1              | CSRSLHGH             |
| <i>Helicobacter acinonychis</i> str. Sheeba      |                     |         | YP_664840.1,<br>YP_664846.1 | CAQNIHGH<br>CAQNIHGH |
| <i>Helicobacter pylori</i> J99                   |                     |         | NP_223585.1                 | CAQNIHGH             |

**Supplemental Table 3. Strains and Plasmids**

| Strains                   | Genotype/Comments                                                                                                                                                                      | Reference/Source                                      |
|---------------------------|----------------------------------------------------------------------------------------------------------------------------------------------------------------------------------------|-------------------------------------------------------|
| <b><i>E. coli</i></b>     |                                                                                                                                                                                        |                                                       |
| JW2735                    | <i>rrnB3 ΔlacZ4787 hsdR514 Δ(araBAD)567 Δ(rhaBAD)568 rph-1 ΔygcM</i>                                                                                                                   | (1 single-gene knockout mutants: the Keio collection) |
| GM2163                    | F <sup>-</sup> <i>ara-14 leuB6 fhuA31 lacY1 tsx78 glnV44 galK2 galT22 mcrA dcm-6 hisG4 rfbD1 rpsL 136 dam13::Tn9 xylA5 mtl-1 thi-1 mcrB1 hsdR2</i>                                     | New England Biolab                                    |
| INV110                    | F <sup>-</sup> { <i>traΔ36 proAB lacIq lacZΔM15</i> } <i>rpsL</i> (StrR) <i>thr leu endA thi-1 lacY galK galT ara tonA tsx dam dcm supE44 Δ(lac-proAB) Δ(mcrC-mrr)102::Tn10</i> (TetR) | Invitrogen                                            |
| Topo 10                   | (F <sup>-</sup> <i>mcrA Δ(mrr-hsdRMSmcrBC) Φ80lacZΔM15 ΔlacX74 recA1 araD139 Δ(araleu)7697 galU galK rpsL</i> (StrR) <i>endA1 nupG</i> )                                               | Invitrogen                                            |
| DH5α                      | F <sup>-</sup> <i>recA1 endA1 hsdR17(r<sub>k</sub><sup>-</sup> m<sub>k</sub><sup>+</sup>) supE44 thi-1 gyrA relA1</i>                                                                  | Life Technologies                                     |
| MG1655                    | F <sup>-</sup> λ <sup>-</sup> <i>ilvG- rfb-50 rph-1</i>                                                                                                                                | (2)                                                   |
| VDC2043                   | MG1655 Δ <i>PTPS<sub>I<sub>Ec</sub></sub></i>                                                                                                                                          | This study                                            |
| VDC3267                   | MG1655 Δ <i>folB::Kan<sup>r</sup></i>                                                                                                                                                  | This study                                            |
| VDC3321                   | VDC2043 pBAD24                                                                                                                                                                         | This study                                            |
| VDC3325                   | VDC2043 pBAD24::PTPS-I                                                                                                                                                                 | This study                                            |
| VDC3331                   | VDC2043 pUC19::PTPS-II <sub>rat</sub>                                                                                                                                                  | This study                                            |
| VDC3335                   | VDC2043 pBAD24::PTPS-I/III <sub>Sa</sub>                                                                                                                                               | This study                                            |
| VDC3337                   | VDC2043 pBAD24::PTPS-I/III <sub>Sa</sub> E27A                                                                                                                                          | This study                                            |
| VDC3339                   | MG1655 pBAD24                                                                                                                                                                          | This study                                            |
| VDC3365                   | VDC2043 pBAD24::PTPS-I/III <sub>Sa</sub> Cys26Ala                                                                                                                                      | This study                                            |
| VDC3441                   | VDC2043 pBAD24::PTPS-I/III <sub>Sa</sub> Glu27Cys                                                                                                                                      | This study                                            |
| VDC3447                   | VDC2043 pUC19::PTPS-II <sub>Rn</sub> Cys42Ala and Asn44Cys                                                                                                                             | This study                                            |
| VDC3452                   | VDC2043 pBAD24::PTPS-I <sub>Ec</sub> Lys23Cys and Cys24Ser                                                                                                                             | This study                                            |
| VDC4660                   | VDC2043 pBAD24::PTPS-I <sub>Ab ADPI</sub>                                                                                                                                              | This study                                            |
| VDC3524                   | VDC2043 pBAD24 :: <i>SSO2412</i>                                                                                                                                                       | This study                                            |
| VDC3516                   | VDC2043 pBAD24 :: <i>Pcal 1063</i>                                                                                                                                                     | This study                                            |
| VDC3473                   | VDC3276 pBAD24                                                                                                                                                                         | This study                                            |
| VDC3475                   | VDC3276 pBAD24::PTPS-I/III <sub>Sa</sub> Cys26Ala                                                                                                                                      | This study                                            |
| VDC3477                   | VDC3276 pBAD24::PTPS-I/III <sub>Sa</sub> Glu27Cys                                                                                                                                      | This study                                            |
| VDC3465                   | VDC2043 pBAD24::PTPS-I <sub>Li</sub>                                                                                                                                                   | This study                                            |
| VDC3467                   | VDC2043 pBAD24::PTPS-III <sub>Li</sub>                                                                                                                                                 | This study                                            |
| VDC3469                   | VDC2043 pBAD24::PTPS-I <sub>Cb</sub>                                                                                                                                                   | This study                                            |
| VDC3471                   | VDC2043 pBAD24::PTPS-I/III <sub>Cb</sub>                                                                                                                                               | This study                                            |
| VDC3479                   | VDC3267 pBAD24: <i>PTPS-I/III<sub>Sa</sub></i>                                                                                                                                         | This study                                            |
| VDC3481                   | VDC3267 pBAD24:: <i>PTPS-I/III<sub>Sa</sub></i> Glu27Ala                                                                                                                               | This study                                            |
| VDC3484                   | VDC3267 pUC19::PTPS-II <sub>Rn</sub>                                                                                                                                                   | This study                                            |
| VDC3485                   | VDC3267 pUC19:: <i>PTPS-II<sub>Rn</sub></i> Cys42Ala and Asn44Cys                                                                                                                      | This study                                            |
| VDC3487                   | VDC3267 pBAD24:: <i>folB<sub>Ec</sub></i>                                                                                                                                              | This study                                            |
| VDC3495                   | VDC3267 pBAD24::PTPS-I <sub>Cb</sub>                                                                                                                                                   | This study                                            |
| VDC3493                   | VDC3267 pBAD24::PTPS-I/III <sub>Cb</sub>                                                                                                                                               | This study                                            |
| <b><i>H. volcanii</i></b> |                                                                                                                                                                                        |                                                       |
| H26                       | DS70 <i>ApyrE2</i>                                                                                                                                                                     | (3)                                                   |
| VDC3290                   | H26 Δ <i>HVO 1718</i>                                                                                                                                                                  | This study                                            |
| VDC3241                   | H26 Δ <i>folE2</i>                                                                                                                                                                     | (4)                                                   |
| VDC3453                   | H26 Δ <i>HVO 1718</i> pJAM202::VNG6306                                                                                                                                                 | This study                                            |
| VDC3455                   | H26 Δ <i>HVO 1718</i> pJAM202c                                                                                                                                                         | This study                                            |
| VDC3342                   | H26 Δ <i>HVO 1282</i>                                                                                                                                                                  | This study                                            |
| VDC3405                   | H26 Δ <i>HVO 1282</i> pJAM202c                                                                                                                                                         | This study                                            |

|         |                                                 |            |
|---------|-------------------------------------------------|------------|
| VDC3401 | H26 $\Delta$ HVO 1282 pJAM202:: <i>HVO 1282</i> | This study |
| VDC3442 | H26 $\Delta$ HVO 1284                           | This study |
| VDC3226 | H26 pJAM202c                                    | (5)        |

| <b>Plasmids</b>           | <b>Description</b>                                                                                                                                                         | <b>Reference or source</b> |
|---------------------------|----------------------------------------------------------------------------------------------------------------------------------------------------------------------------|----------------------------|
| pBAD24                    | Amp <sup>r</sup> ; colE1                                                                                                                                                   | (6)                        |
| pTA131                    | Amp <sup>r</sup> ; pMB1; pyrE2 under ferredoxin promoter                                                                                                                   | (7)                        |
| pBY158                    | pTA131 derivative containing the attCm <sup>R</sup> Ccd <sup>R</sup> cassette                                                                                              | (4)                        |
| pGP058                    | pBY158 derivative containing 1000bp Upstream and downstream of <i>HVO 1718</i>                                                                                             | This study                 |
| pGP044                    | pCR8/GW containing 1000bp Upstream and downstream of <i>HVO 1718</i>                                                                                                       | This study                 |
| pGP325                    | pBAD24:: <i>PTPSI<sub>Ec</sub></i>                                                                                                                                         | This study                 |
| pSTV28MPS                 | pSTV28 containing <i>mtrA</i> , <i>PTPS-II<sub>Rn</sub></i> and <i>spr</i>                                                                                                 | (8, 9)                     |
| pBY148                    | pUC19:: <i>PTPS-II<sub>Rn</sub></i> cloned between <i>EcoRI</i> and <i>BamHI</i> from pSTV28MPS                                                                            | This study                 |
| pGP447                    | pUC19:: <i>PTPS-II<sub>Rn</sub></i> Cys42Ala and Asn44Cys                                                                                                                  | This study                 |
| pGP452                    | pBAD24:: <i>PTPS-I<sub>Ec</sub></i> Lys23Cys and Cys24Ser                                                                                                                  | This study                 |
| pGP365                    | pBAD24:: <i>PTPS-I/III<sub>Sa</sub></i> Cys26Ala                                                                                                                           | This study                 |
| pGP441                    | pBAD24:: <i>PTPS-I/III<sub>Sa</sub></i> Cys26Ala and Glu27Cys                                                                                                              | This study                 |
| pJAM202                   | Amp <sup>r</sup> Nov <sup>r</sup> ; pBAP5010 containing P2 <sub><i>rnn</i></sub> - <i>psmB-his<sub>6</sub></i> ; $\beta$ -His <sub>6</sub> expressed in <i>H. volcanii</i> | [46]                       |
| pJAM202c                  | Amp <sup>r</sup> ; Nov <sup>r</sup> ; pJAM202-derived control plasmid                                                                                                      | (10)                       |
| pGP401                    | pJAM202:: <i>HVO 1282</i>                                                                                                                                                  | This study                 |
| pGP425                    | pJAM202:: <i>VNG6306</i>                                                                                                                                                   | This study                 |
| pCH129                    | pBAD24:: <i>PTPS-I<sub>Ab</sub></i>                                                                                                                                        | This study                 |
| pIKB272                   | pTA131:: <i>HVO 1282</i>                                                                                                                                                   | This study                 |
| pIKB306                   | pTA131:: <i>HVO 1284</i>                                                                                                                                                   | This study                 |
| Sa PTPS-III E27A – pBAD24 | pBAD24:: <i>PTPS-I/III<sub>Sa</sub></i> Glu27Ala                                                                                                                           | (11)                       |
| Sa PTPS-III– pBAD24       | pBAD24:: <i>PTPS-I/III<sub>Sa</sub></i>                                                                                                                                    | (11)                       |
| Li PTPS-I– pBAD24         | pBAD24:: <i>PTPS-I<sub>Li</sub></i>                                                                                                                                        | (11)                       |
| Li PTPS-III– pBAD24       | pBAD24:: <i>PTPS-III<sub>Li</sub></i>                                                                                                                                      | (11)                       |
| Cb PTPS-I – pBAD24        | pBAD24:: <i>PTPS-I<sub>Cb</sub></i>                                                                                                                                        | (11)                       |
| Cb PTPS-III– pBAD24       | pBAD24:: <i>PTPS-I/III<sub>Cb</sub></i>                                                                                                                                    | (11)                       |
| pGPP522                   | pBAD24:: <i>PTPS-VI<sub>Ss</sub></i>                                                                                                                                       | This study                 |
| pGP505                    | pBAD24:: <i>PTPS-V<sub>Pc</sub></i>                                                                                                                                        | This study                 |

Genome abbreviation. Ab: *Acinetobacter baylyi* ADP1, Cb: *Clostridium botulinum*, Ec: *Escherichia coli*, Li: *Leptospira interrogans* L1-130, Pf: *Plasmodium falciparum*, Sa: *Synthrophus aciditrophicus*, Rn: *Rattus norvegicus*, Ss: *Sulfolobus solfataricus* P2, Pc: *Pyrobaculum calidifontis*.



**Supplemental Table 4.** List of primers used in this study

| <b>Primer name</b>                  | <b>Sequence</b>                              | <b>Use</b>                      |
|-------------------------------------|----------------------------------------------|---------------------------------|
| <b>Site directed mutagenesis</b>    |                                              |                                 |
| mutSyacCtoA_Fw                      | AACTATCCGGGCAACGCCGAACAT                     | Construction of plasmid pGP365  |
| mutSyacCtoA_Rev                     | GCCATGCAGATGTTTCGGCGTTGCC                    |                                 |
| SyacmutAEtoAC_Fw                    | GGCAACGCCTGCCATCTGCAT                        | Construction of plasmid pGP441  |
| SyacmutAEtoAC_Rev                   | CATGCAGATGGCAGGCGTTGC                        |                                 |
| YgcMmutCX3toCX4_Fw                  | CCGGAAGGGCATTGTAGTGGTTCGCTG                  | Construction of plasmid pGP452  |
| YgcMmutCX3toCX4_Rev                 | GTGCAGGCGACCACTACAATGCCCTTCC                 |                                 |
| PTPSIImutCX5toCX3_Fw                | GGGAAAGCCAACGTCCGAATGGC                      | Construction of plasmid pGP447  |
| PTPSIImutCX5toCX3_Rev               | ATGGCCATTCGGACAGTTGGCTTTCCC                  |                                 |
| <b>Cloning</b>                      |                                              |                                 |
| HsQueD_NdeI_Fw                      | GAGCGCATATGCGTTCAGCACAGTCCAA                 | Construction of plasmid pGP425  |
| HsQueD_BlpI_Rev                     | GAGCGGCTCAGCTCAGTTCGGGCCAGCAGT               |                                 |
| QueDADP1_EcoRI_Fw                   | TTGATCGGAATTCACCATGTTAATTCGTAAGTTATTTAAGTTTG | Construction of plasmid pCH129  |
| QueDADP1_XbaI_Rev                   | TTGATCTCTAGATTAAATATGAACTTGCAATTCCAC         |                                 |
| ygcM_EcoRI_Fw                       | ATATGAATTCGTAGAGAAATTATGATGTCCAC             | Construction of plasmid pGP325  |
| ygcM_KpnI_Rev                       | ATATGGTACCTCATTTCGCCGCGATAGATACA             |                                 |
| HvPTPSIV_NdeI_Fw                    | CATATGTACC GCGTCTCGGTTCCG                    | Construction of plasmid pGP401  |
| HvPTPSIV_BlpI_Rev                   | GCTCAGCTCAGAGCGGAGTCTCGTAGGT                 |                                 |
| PcQueD2WHGH_Fw                      | AGGAGCCATGGGGACGTGTGTAGAATT                  | Construction of plasmid pGP505  |
| PcQueD2WHGH_Rev                     | AGGAGGGATCCTTA ACTCTTGCTGAAGTAGAAGCA         |                                 |
| SsQueD2QHGH_Fw                      | AGGAGGAATTCACCATGAAAGTTAGAGTTGGTATCGAAG      | Construction of plasmid pGP522  |
| SsQueD2QHGH_Rev                     | TTATGGATACTCTATAATTGCATATGA                  |                                 |
| ECygcM_S                            | GGTATTGAGGGTTCGCATGATGTCCACCACG              | Construction of plasmid pBL-I41 |
| ECygcM_AS                           | AGAGGAGAGTTAGAGCCTCATTTCGCCGCG               |                                 |
| MJ1272-Fwd                          | GGTCATATGATGTTGGAGTTAAAT                     | Construction of plasmid pMJ1272 |
| MJ1272-Rev                          | GCTGGATCCTTATTTACCTCTAAG                     |                                 |
| <b><i>H. volcanii</i> deletions</b> |                                              |                                 |
| EntUPDNHvqueD_Fw                    | CGGATTCGTAGATGAGCGTGAT                       | Construction of plasmid pGP044  |
| EntUPDNHvqueD_Rev                   | CGGTCGTCGCGCTGTCCATG                         |                                 |
| UDqueDD_Fw                          | GAGCTCTGCGCCGGCTTCT                          | Construction of plasmid pGP058  |
| UDqueDD_Rev                         | CGTTCGCCTGCTCGGAC                            |                                 |
| GTPCHIII_N_Fw                       | CGGGCCCCCTCGAGCTTTCGTCGGGTTGTTTCG            | Construction of plasmid pIKB306 |
| GTPCHIII_N_Rev                      | GACGCGTTCATATGCTGCGTATTCGTCACGGTAGA          |                                 |
| GTPCHIII_C_Fw                       | GCATATGAACGCGTCAGACGACTGAGCGATGGAG           |                                 |
| GTPCHIII_C_Rev                      | CGGGCTGCAGGAATTCAAGCGACTCGGGATGGAC           |                                 |

|                                                      |                                     |                                                |
|------------------------------------------------------|-------------------------------------|------------------------------------------------|
| PTPS4_N_Fw                                           | CGGGCCCCCCTCGAGCGCTCAACTTCGTGATGGAC | Construction of plasmid pIKB272                |
| PTPS4_N_Rev                                          | GACGCGTTCATATGCGTTCGGAACCGTCAGGTG   |                                                |
| PTPS4_C_Fw                                           | GCATATGAACGCGTCACCTACGAGACTCCGCTCTG |                                                |
| PTPS4_C_Rev                                          | CGGGCTGCAGGAATTCCGGTTAGCTTCCAGTCGTC |                                                |
| <b><i>H. volcanii</i> verifications of deletions</b> |                                     |                                                |
| intckqueD_Fw                                         | CTCCACCACGACGGCAAGTGT               | Internal check for deletion of <i>HVO_1718</i> |
| intckqueD_Rev                                        | CGCTGACCGAGACCGAGACC                |                                                |
| Chk_HvqueD_Fw                                        | ACCCGAAGATATCAGTATTATAAC            | External check for deletion of <i>HVO_1718</i> |
| Chk_HvqueD_Rev                                       | GTTCGTAGCCGCGTCGCGTT                |                                                |
| HvGTPCHIIIintck_Fw                                   | AACATGGTTCGCGGTCACCAA               | Internal check for deletion of <i>HVO_1284</i> |
| HvGTPCHIIIintck_Rev                                  | ACAGTCTTCGAGCGCGTGTT                |                                                |
| HvGTPCHIIIck_Fw                                      | GGAGGTCGTCGTAGTGGAAAC               | External check for deletion of <i>HVO_1284</i> |
| HvGTPCHIIIck_Rev                                     | CGTCTTCGAGGAGTCGGTAG                |                                                |
| HvPTPS4intck_Fw                                      | TCTCGGTTCCGAGGGACCTC                | Internal check for deletion of <i>HVO_1282</i> |
| HvPTPS4intck_Rev                                     | CGCTCGCCACGTCGTCCTC                 |                                                |
| HvPTPS4ck_Fw                                         | AGCCGCGTCTTCGCGTTCAA                | External check for deletion of <i>HVO_1282</i> |
| HvPTPS4ck_Rev                                        | GATAGCGAGCGACTGCAACC                |                                                |

c Restriction sites are underlined; point mutations are in bold.

## Supplemental Material and Methods

### Preparation of *M. jannaschii* Cell Extracts.

*M. jannaschii* cells were grown as previously described (12). Cell extracts of *M. jannaschii* were prepared by sonicating 5 g of a frozen cell pellet suspended in 10 ml of TES extraction buffer (50 mM TES/K<sup>+</sup>, 10 mM MgCl<sub>2</sub>, 10 mM DTT, pH 7.5) under Ar for 5 min at 3°C. A W-385 Sonicator with a microtip from Heat Systems-Ultrasonics, Inc was used. The resulting mixture was centrifuged under Ar (27000 × g, 10 min) and was stored frozen under Ar at –20°C until used. The protein concentration of the *M. jannaschii* extract was ~30 mg/ml. Protein concentrations were measured using the BCA total protein assay (Pierce) with bovine serum albumin as a standard.

### Assay of pterin, biopterin and hydroxymethylpterin in *M. jannaschii*

To 0.5 g of frozen cell pellet is added 0.5 mL of water and the sample shaken and heated at 100°C for 5 min. To the suspension is added 200 µL of 50% TCA and the mixture heated an addition 100°C for 10 min and then centrifuged (14000g, 10 min). The pellet was washed with 100 µL of 5% TCA centrifuged (14000g, 10 min) and the combined supernates mixed with iodine in MeOH (50 mg/mL) to give an intensity purple solution. After 1 hr at room temperature the color was dispelled by the addition of a saturated solution of sodium bisulfite in water. An equal volume of methanol was then added, and the samples were centrifuged (14,000g, 10 min) to remove the precipitate. After removal of the evaporation methanol the sample was applied to a Dowex 50W-8X-H<sup>+</sup> column (3 x 10 mm) that, after washing with water, the bound pterins were eluted with 6 M NH<sub>4</sub>OH. The pterins purified by preparative LC using the acetonitrile-water-formic acid (88%), 40:10:5 v/v/v as the developing solvent. The pterin, biopterin and hydroxymethylpterin containing spot was then removed (they all have the same TLC R<sub>f</sub>) and eluted with 50% methanol. After removal of the methanol by evaporation the samples were assayed by HPLC using the Varian PursuitXR<sub>s</sub> C18 and Varian Pursuit-PFP HPLC columns as described in the methods section of the text. These two columns were required for the separation of the pterin from the 6-hydroxymethylpterin. Of the three-targeted pterins only the 6-hydroxymethylpterin, an intermediate in methanopterin biosynthesis, was detected. The absence of biopterin indicated that this pterin was not produced by *M. jannaschii* and that these cells would not contain PTPS-II.

## **Supplemental Results**

**Measuring the incorporation Deuterium into CPH<sub>4</sub> produced by the MJ1272 derived enzyme.**

When a incubation with sepiapterin and H<sub>2</sub>neoterin-P was done in the presence of 50% D<sub>2</sub>O the amount of deuterium incorporated into the recovered pterin product was 48% of the molecules with one deuterium. This would have been incorporated in the last (retroaldol) reaction leading to 6-carboxytetrahydropterin product (see Figure 6 of main manuscript). Subsequent oxidative decarboxylation would lead the C-6 labeled pterin that was isolated and measured.

### **Testing proton exchange of pterin and dihydropterin**

To establish the extent of chemical proton exchange of pterin and dihydropterin each were dissolved in D<sub>2</sub>O and heated for different periods under different conditions and then analyzed for deuterium incorporation by mass spectrometry. After this treatment the dihydropterin were oxidized to pterin prior to analysis as described above and the pterins purified by retention on a Dowex 50W-8X-H<sup>+</sup> column followed by elution with aqueous ammonia. The resulting pterins were analyzed for deuterium exchange either by direct insertion (DI) mass spectral of the pterin, M<sup>+</sup> = 163 m/z or by DI or GC-MS analysis of the pterin (TMS)<sub>2</sub> derivative having intense ions at M<sup>+</sup> = 307 m/z and M<sup>+</sup> -15 = 292 m/z. 7-8-Dihydropterin was prepared either by reduction of pterin with Adams catalysis (13) or by reduction with zinc metal in 1 N NaOH (14). The dihydropterin in dilute phosphate buffer was evaporated to dryness with a stream of nitrogen gas and place in D<sub>2</sub>O under argon and heated at 100°C. After 17 hr the sample was cooled and oxidized with I<sub>2</sub> in methanol followed by bisulfite reduction. The pterin was then isolate on a Dowex 50W-8X-H<sup>+</sup> column and converted into the (TMS)<sub>2</sub> derivative as described above. Mass spectral analysis showed that the pterin had incorporated in 15% of the molecules a single deuterium that we consider to be incorporated at C-7. Pterin heated under the same conditions

did not incorporate any deuterium. These results show that the label from the incubations with substrates and D<sub>2</sub>O would not result from the chemical incorporation into pterin or dihydropterin.

### **Involvement of cysteine in the catalytic mechanism of the MJ1272 derived enzyme.**

Incubation of the enzyme (10 µg) with 2 mM iodoacetamide for 1 hr resulted in the alkylation of the one conserved cysteine producing an enzyme that exhibited 38% of the activity compared to the untreated control. These results indicated that the cysteine in the PTPS-I signature motif {C-X(3)-H-G-H} was either involved in the enzymatic mechanism and/or substrate binding of to this enzyme.

### **Metal binding analysis of MJ1272**

#### **Metal analysis**

Metal analysis of the MonoQ purified MJ1272 gene product was performed at the Virginia Tech Soil Testing Laboratory using inductively coupled plasma emission spectrophotometry. Instrumentation included a Spectro CirOS VISION made by Spectro Analytical Instruments equipped with a Crossflow nebulizer with a Modified Scott spray chamber, nebulizer rate was 0.75 L/min. A 50 mg/L yttrium internal standard was introduced by peristaltic pump. Samples were analyzed for iron, manganese and zinc.

Purified MJ1272 was also analyzed for iron, manganese, nickel, and zinc by ICP spectroscopy. Manganese, and nickel were not detected, however a 0.6 molar ratio of zinc and a 0.1 molar ratio of iron per MJ1272 monomer was measured. To test the effect of different metals on activity MJ1272 was incubated with different metals and assayed by HPLC for the different products obtained from sepiapterin. The MJ1272 gene product had the following order of activity with the divalent metal indicated: Fe>>>Co>>Zn, Cu, Ni, Mn, Mg. The ratio of 6-carboxypterin and

pterin varied between metals. Additional minor peaks were observed in some of the reactions but were not identified. Incubations were conducted in the typical assay conditions with 2 mM metal added.

## References

1. Baba, T., Ara, T., Hasegawa, M., Takai, Y., Okumura, Y., Baba, M., Datsenko, K. A., Tomita, M., Wanner, B. L., and Mori, H. (2006) Construction of *Escherichia coli* K-12 in-frame, single-gene knockout mutants: the Keio collection, *Mol. Syst. Biol.* 2, 2006.0008.
2. Blattner, F. R., Plunkett, G., 3rd, Bloch, C. A., Perna, N. T., Burland, V., Riley, M., Collado-Vides, J., Glasner, J. D., Rode, C. K., Mayhew, G. F., Gregor, J., Davis, N. W., Kirkpatrick, H. A., Goeden, M. A., Rose, D. J., Mau, B., and Shao, Y. (1997) The complete genome sequence of *Escherichia coli* K-12, *Science* 277, 1453-1474.
3. Allers, T., and Ngo, H. P. (2003) Genetic analysis of homologous recombination in Archaea: *Haloferax volcanii* as a model organism, *Biochem. Soc. Trans.* 31, 706-710.
4. El Yacoubi, B., Phillips, G., Blaby, I. K., Haas, C. E., Cruz, Y., Greenberg, J., and de Crécy-Lagard, V. (2009) A Gateway platform for functional genomics in *Haloferax volcanii*: deletion of three tRNA modification genes, *Archaea* 2, 211-219.
5. Blaby, I. K., Phillips, G., Blaby-Haas, C. E., Gulig, K. S., El Yacoubi, B., and de Crécy-Lagard, V. (2010) Towards a systems approach in the genetic analysis of archaea: accelerating mutant construction and phenotypic analysis in *Haloferax volcanii*, *Archaea* 2010, 426239.

6. Guzman, L. M., Belin, D., Carson, M. J., and Beckwith, J. (1995) Tight regulation, modulation, and high-level expression by vectors containing the arabinose PBAD promoter, *J. Bacteriol.* *177*, 4121-4130.
7. Allers, T., Ngo, H. P., Mevarech, M., and Lloyd, R. G. (2004) Development of additional selectable markers for the halophilic archaeon *Haloferax volcanii* based on the *leuB* and *trpA* genes, *Appl. Environ. Microbiol.* *70*, 943-953.
8. Yamamoto, K., Kataoka, E., Miyamoto, N., Furukawa, K., Ohsuye, K., and Yabuta, M. (2003) Genetic engineering of *Escherichia coli* for production of tetrahydrobiopterin, *Metabol. Engin* *5*, 246-254.
9. Kaczowka, S. J., and Maupin-Furlow, J. A. (2003) Subunit topology of two 20S proteasomes from *Haloferax volcanii*, *J. Bacteriol.* *185*, 165-174.
10. Zhou, G., Kowalczyk, D., Humbard, M. A., Rohatgi, S., and Maupin-Furlow, J. A. (2008) Proteasomal components required for cell growth and stress responses in the haloarchaeon *Haloferax volcanii*, *J. Bacteriol.* *190*, 8096-8105.
11. Pribat, A., Jeanguenin, L., Lara-Nunez, A., Ziemak, M. J., Hyde, J. E., de Crécy-Lagard, V., and Hanson, A. D. (2009) 6-pyruvoyltetrahydropterin synthase paralogs replace the folate synthesis enzyme dihydroneopterin aldolase in diverse bacteria, *J. Bacteriol.* *191*, 4158-4165.
12. Mukhopadhyay, B., Johnson, E. F., and Wolfe, R. S. (1999) Reactor-scale cultivation of the hyperthermophilic Methanarchaeon *Methanococcus jannaschii* to high cell densities, *Appl. Environ. Microbiol.* *65*, 5059-5065.

13. Goto, M., Sugiura, K., and (1971) Biosynthesis of pteridines in *Drosophila melanogaster* and *Rana catesbeiana*, In *Methods Enzymol.* (McCormick, D., B. , and Wright, L. D., Eds.), pp 746-761, Academic Press.
14. White, R. H. (1998) Methanopterin biosynthesis: methylation of the biosynthetic intermediates, *Biochim. Biophys. Acta* 1380, 257-267.



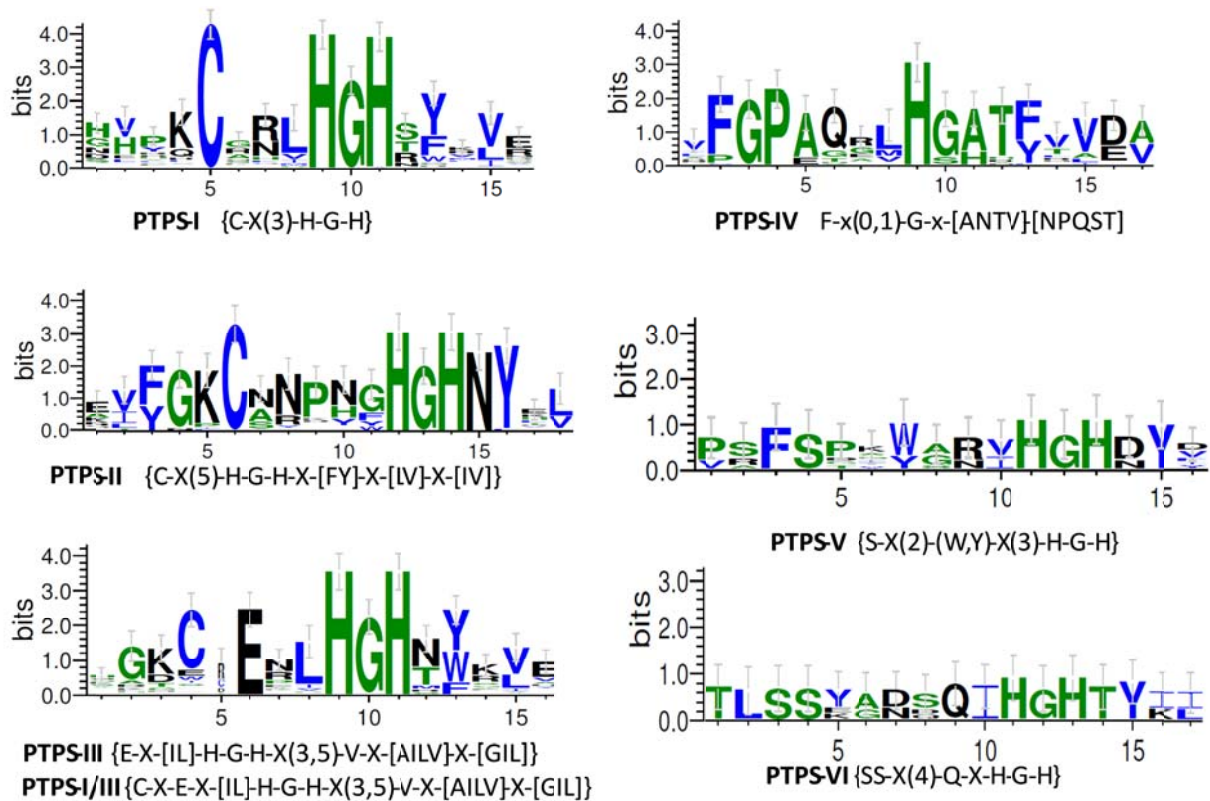

**Supplemental Figure 1.** Sequence Logos and signatures. Signature motifs obtained using Prosite and logos for the PTPS-I to IV family members. The {C-X(3)-H-G-H} motif is found in PTPS-I member involved in Q biosynthesis encoded by the *queD* gene. The {C-X(5)-H-G-H-X-[FY]-X-[LV]-X-[IV]} motif is found in PTPS-II involved in BH<sub>4</sub> biosynthesis, The {E-X-[IL]-H-G-H-X(3,5)-V-X-[AILV]-X-[GIL]} motif is found in PTPS-III involved in folate biosynthesis, the {C-E-X-[ILPV]-H-G-H-X-[FWY]-X(3)-[AILV]} motif is found in PTPS-I/III involved in both queuosine and folate biosynthesis. The {F-X(0,1)-G-X-[ANTV]-[NPQST]} motif was found in PTPS-IV sequences.

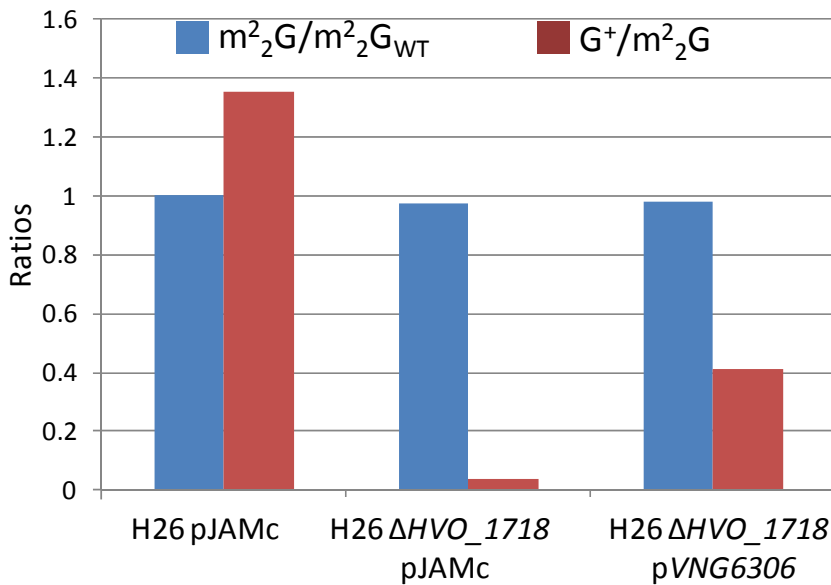

**Supplemental Figure 2.** Complementation of  $G^+$  deficient phenotype by *H. salinarum* QueD homolog. The  $G^+$  deficient phenotype was complemented by the in trans expression of *H. salinarum* Vng6306, *HVO\_1718* homolog, in the mutant strain. To control for the amount of tRNA, the  $m^2G$  content in the complemented strains was compared with the  $m^2G$  content in the WT control (blue bars). The ratios of  $G^+/m^2G$  of tRNA extracted from the *H. volcanii*  $\Delta HVO\_1718$  derivatives strains are shown by the red bars.

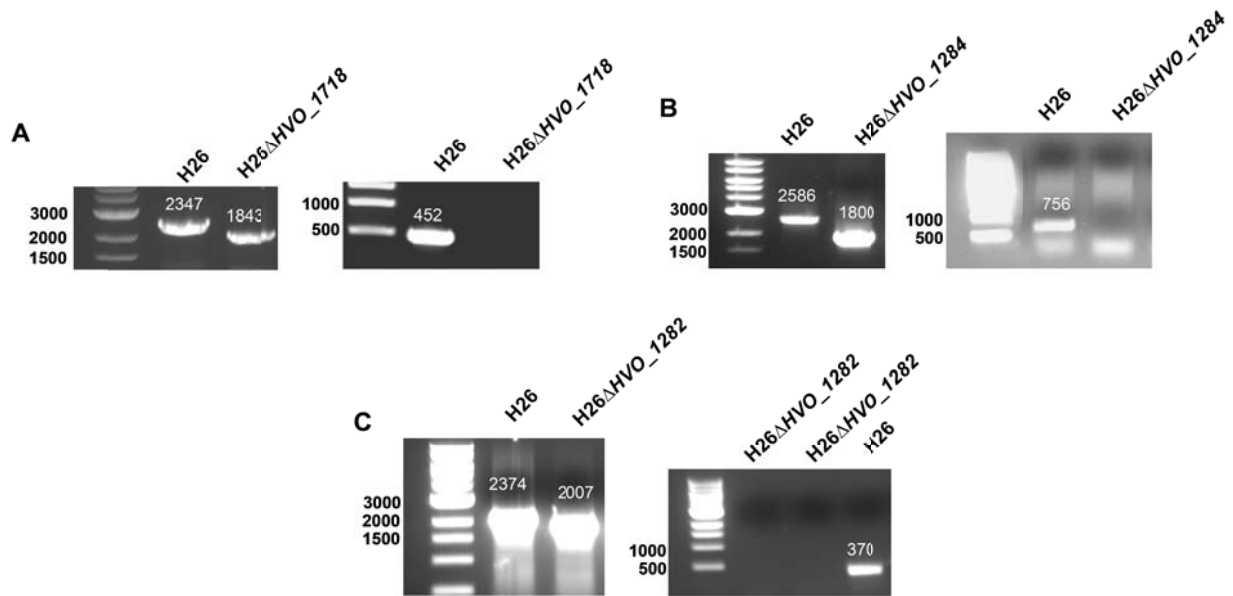

**Supplemental Figure 2.** PCR verifications of *H. volcanii* gene deletions of (A) *HVO\_1718*, (B) *HVO\_1284* and (C) *HVO\_1282*. The gene deletions were verified by locus-specific PCR using primer pairs designed to anneal upstream and downstream the deletion cassette and primers pairs designed to anneal within the deleted gene (as indicated in Supplementary Table 2). Predicted amplicon sizes are indicated above each PCR band.
